# Supplementary material for: Towards Affordable Financing: The Role of Local Government Attention in Reducing Cost of Equity Capital for Renewable Energy Firms
Source: Research Square preprint supplement (doi:10.21203/rs.3.rs-8522490/v1), 2026-02-09
Supplement: Supplementary file 1 [file 45cc14b5a9fab4e1baa0d276.docx]

**Highlights**

- Local government attention (LGA) significantly reduces the implied cost of equity capital (ICOC) among local listed renewable energy firms.
- By increasing land transfers and public investment of local governments, LGA mitigates the ICOC through the optimization of governmental resource allocation.
- By increasing executives’ green attention and carbon information disclosure quality of local renewable energy firms, LGA mitigates ICOC through the enhancement of channels for enterprise’s information disclosure.
- The mitigating effect of LGA on ICOC is more pronounced in firms characterized by local state-owned, capital-intensive utility; and regions characterized by better grid integration, lower competitive pressure, lower dependence on traditional resource sectors, and stronger innovation environments.
