# Supplementary material for: Towards Affordable Financing: The Role of Local Government Attention in Reducing Cost of Equity Capital for Renewable Energy Firms
Source: Research Square preprint supplement (doi:10.21203/rs.3.rs-8522490/v1), 2026-02-09
Supplement: Supplementary file 2 [file 50fe39d502d23e3bae83af2a.docx]

| *Table 1 Variable Definitions and Data Sources* | | | | | | | |
| --- | --- | --- | --- | --- | --- | --- | --- |
| *Variable* | *Definition* | *Source* | *Obs.* | *Mean* | *S.D.* | *p25* | *Median.* |
| *Panel A: Dependent variable* | | |  |  |  |  |  |
| *ICOC* | The average value of rPEG, rMPEG and rOJN | Easton (2004), Ohlson and Juettner-Nauroth (2005), Yan et al.(2024). The calculation process is in Appendix B. | 6,984 | 11.271 | 9.032 | 5.205 | 9.879 |
| *Panel B: Independent variable* | | | | | | | |
| *LGA* | The frequency of renewable energy industry related bi-grams in the economy and industry development target texts in the local government work report in the China’s Prefecture cities. | The official website of the local government. | 6,984 | 0.237 | 0.278 | 0.065 | 0.159 |
| *Panel C: Firm-level control variables* | | | | | | | |
| *lnSize* | The log value of total assets, measures the firm size. | CSMAR database | 6,984 | 22.535 | 1.184 | 21.675 | 22.428 |
| *WCC* | Firms' working capital. | CSMAR database | 6,984 | 0.151 | 0.225 | 0.002 | 0.148 |
| *lnRevenue* | The log value of total revenue. | CSMAR database | 6,984 | 21.814 | 1.394 | 20.876 | 21.725 |
| *IIS* | The proportion of the institutional investors in a firm. | CSMAR database | 6,984 | 42.587 | 22.732 | 25.141 | 43.692 |
| *Beta* | CAPM Beta. For each firm i in year t, we first conduct a rolling regression with a window period of 36 months, using the monthly excess return (the daily return of the stock minus the risk-free rate) regressed against the monthly market risk premium (the daily return of the market minus the risk-free rate). | CSMAR database | 6,984 | 1.072 | 0.391 | 0.837 | 1.044 |
| *lnAge* | The log value of the years from the establishment of the company to year t | CSMAR database | 6,984 | 3.013 | 0.298 | 2.833 | 3.045 |
| *leverage* | The leverage ratio of firms. | CSMAR database | 6,984 | 0.491 | 0.195 | 0.353 | 0.497 |
| *Tobin’s Q* | The tobin’s q value of firms. Tobin’s Q = Market Value/total asset. | CSMAR database | 6,984 | 1.963 | 2.576 | 1.196 | 1.519 |
| *FCFE* | The free cash flow to equity. | CSMAR database | 6,984 | -0.177 | 0.188 | -0.28 | -0.142 |
| *ROE* | The return on equity. | CSMAR database | 6,984 | 0.044 | 0.134 | 0.018 | 0.06 |
| *Analyst_coverage* | The natural logarithm of one plus the number of analysts covering a firm in a given year | CSMAR database | 6,984 | 5.828 | 8.395 | 0 | 2 |
| *Illqiduidity* | The illiquidity ratio defined by Amihud (2002), defined as the average of the absolute value of stock daily return divided by daily trading volume. . | CSMAR database | 6,984 | 0.043 | 0.045 | 0.015 | 0.029 |
| *Panel D: City-level control variables* | | | | | | | |
| *lnGDP* | The log value of a city’s GDP in year t. | CEIC database | 6,984 | 8.751 | 0.973 | 8.047 | 8.824 |
| *GDP_growth* | The growth rate of a city’s GDP compared with last year. | CEIC database | 6,984 | 6.74 | 2.884 | 4.6 | 7.1 |
| *lnGov_expense* | The log value of a city’s total fiscal expenditure. | CEIC database | 6,984 | 0.07 | 0.081 | 0.027 | 0.069 |
| *lnGov_revenue* | The log value of a city’s total fiscal income. | CEIC database | 6,984 | 10.709 | 1.284 | 9.704 | 10.731 |
| *mayor_age* | The age of a city’s mayor in year t. | CEIC database | 6,984 | 54.213 | 3.944 | 52 | 55 |
| *gdp_target* | The GDP target set by a city in year t. | CEIC database | 6,984 | 0.068 | 0.035 | 0.06 | 0.07 |

*Table 2 Baseline Results*

|  | **(1)** | **(2)** |
| --- | --- | --- |
| VARIABLES | *ICOC* | *ICOC* |
| *LGA* | -1.394*** | -1.188** |
|  | (0.431) | (0.602) |
| *Constant* | -0.225 | 0.201 |
|  | (0.139) | (0.124) |
| *Observations* | 6,984 | 6,984 |
| *Firm Controls* | *YES* | *YES* |
| *City Controls* | *NO* | *YES* |
| *Individual fixed effect* | *NO* | *YES* |
| *Time fixed effect* | *NO* | *YES* |
| *Province fixed effect* | *NO* | *YES* |
| *Industry fixed effect* | *NO* | *YES* |
| *Segmentation ratio* | *K-fold=5* | *K-fold=5* |
| *Base learner* | *Random forest* | *Random forest* |

*Notes: Table 2 employs the DML method to examine the causal relationship between local government attention (LGA) and firms’ implied cost of capital (ICOC). Column (1) excludes city controls and all fixed effects. Column (2) introduces city controls and adds individual, time, province, and industry fixed effects. Firm controls are included in both specifications. We adopt Random forest as the base learner. To mitigate overfitting, we implement 5-fold cross-fitting (K=5) in the estimation. As the DML method does not require predefining the functional form of control variables, we denote their inclusion with "YES/NO" rather than reporting coefficient estimates. All continuous variables are winsorized at the 1st and 99th percentiles to reduce the impact of extreme values. Standard errors are clustered at the firm level to account for heteroscedasticity and serial correlation, with robust standard errors reported in parentheses. Significance levels are indicated by *** (1%), ** (5%), and * (10%).*

| *Table 3 Robustness check results regarding machine learning predictors.* | | | | | | |
| --- | --- | --- | --- | --- | --- | --- |
| VARIABLES | *Changing the machine learning models* | | |  | *Change the sample segmentation ratio* | |
| *(1)* | *(2)* | *(3)* |  | *(4)* | *(5)* |
| *Neural_Network* | *Lasso* | *SVM* |  | *Kfolds=3* | *Kfolds=8* |
| *LGA* | -1.154** | -1.140** | -1.268** |  | -0.986* | -1.319** |
|  | (0.463) | (0.494) | (0.568) |  | (0.588) | (0.605) |
|  |  |  |  |  |  |  |
| *Constant* | -0.041 | -0.012 | 1.383*** |  | 0.227* | 0.172 |
|  | (0.039) | (0.060) | (0.187) |  | (0.129) | (0.123) |
| *Observations* | 6,984 | 6,984 | 6,984 |  | 6,984 | 6,984 |
| *Individual fixed effect* | YES | YES | YES |  | YES | YES |
| *Time fixed effect* | YES | YES | YES |  | YES | YES |
| *Province fixed effect* | YES | YES | YES |  | YES | YES |
| *Industry fixed effect* | YES | YES | YES |  | YES | YES |
| *Firm Controls* | YES | YES | YES |  | YES | YES |
| *City Controls* | YES | YES | YES |  | YES | YES |
| *Notes: Table 3 employs the DML method to present robustness check results for the machine learning predictors. This table is divided into two sets of tests. Columns (1) to (3) focus on changing the base learner. Columns (4) to (5) adjust the sample segmentation ratio. In Columns (1) to (3) we replace the baseline Random forest with three alternative machine learning models including Neural_Network, Lasso and SVM to mitigate potential bias from model specification. In Columns (4) and (5) we modify the K-fold value for sample segmentation and set the K-fold value to 3 and 8 respectively to test the stability of the estimation results. All specifications include individual, time, province and industry fixed effects. All specifications also include firm and city controls. All continuous variables are winsorized at the 1st and 99th percentiles to reduce the impact of extreme values. Standard errors are clustered at the firm level to account for heteroscedasticity and serial correlation. Robust standard errors are reported in parentheses. Significance levels are indicated by *** for 1%, ** for 5% and * for 10%.* | | | | | | |

*Table 4 IV-methods*

|  | **(1)** | **(2)** |
| --- | --- | --- |
| VARIABLES | *ICOC* | *ICOC* |
| *IV* | 0.764*** |  |
|  | (18.80) |  |
| *LGA* |  | -3.839** |
|  |  | (-2.37) |
| *Constant* | -0.225 | 0.201 |
|  | (0.139) | (0.124) |
| *Observations* | 6,094 | 6,094 |
| *Firm Controls* | *YES* | *YES* |
| *City Controls* | *YES* | *YES* |
| *Individual fixed effect* | *YES* | *YES* |
| *Time fixed effect* | *YES* | *YES* |
| *Province fixed effect* | *YES* | *YES* |
| *Industry fixed effect* | *YES* | *YES* |
| *Kleibergen-Paap rk LM* | *58.840**** |  |
| *Cragg-Donald Wald F* | *353.438* |  |

*Notes: To alleviate the endogeneity of the core explanatory variable LGA, this paper adopts the GDP-weighted average of government attention levels of other cities in the same province after excluding the target city as the instrumental variable. Column (1) reports first-stage regression results, where the IV is significantly positively correlated with LGA at the 1% significance level. The Cragg-Donald Wald F-statistic of 353.438 exceeds 10, rejecting the weak instrument hypothesis, and the Kleibergen-Paap rk LM statistic is significant at the 1% level, confirming the instrument’s validity. Column (2) presents second-stage regression results with all firm and city controls as well as individual, time, province and industry fixed effects. LGA exerts a significantly negative impact on corporate financing cost ICOC at the 5% significance level. All regressions use cluster-robust standard errors clustered at the firm level, a 5-fold segmentation ratio and random forest as the base learner, and the result remains robust after addressing endogeneity.*

| *Table 5 Other robustness checks* | | | |
| --- | --- | --- | --- |
| VARIABLES | *Alternative estimation medthod and measure of virables.* | | |
| *(1)* | *(2)* | *(3)* |
| *Fixed effect model* | *Alternative Measure of LGA* | *Overlapping Policies* |
| *LGA* | -1.394*** |  | -1.605*** |
|  | (0.431) |  | (0.567) |
| *LGA_Specific* |  | -4.615** |  |
|  |  | (1.990) |  |
|  |  |  |  |
| *Constant* | -0.225 | 0.181 | 0.177 |
|  | (0.139) | (0.123) | (0.122) |
| *Observations* | 6,984 | 6,984 | 6,984 |
| *Individual fixed effect* | *YES* | *YES* | *YES* |
| *Time fixed effect* | *YES* | *YES* | *YES* |
| *Province fixed effect* | *YES* | *YES* | *YES* |
| *Industry fixed effect* | *YES* | *YES* | *YES* |
| *Firm Controls* | *YES* | *YES* | *YES* |
| *City Controls* | *YES* | *YES* | *YES* |
| *Segmentation ratio* | *K-fold=5* | *K-fold=5* | *K-fold=5* |
| *Base learner* | *Random forest* | *Random forest* | *Random forest* |
| *Notes: This table includes three sets of tests corresponding to alternative estimation method and measure of variables. Columns (1) adopts the fixed effect model as an alternative estimation approach. Column (2) uses LGA_Specific as an alternative measure of LGA. Column (3) accounts for overlapping policies to address potential interference from concurrent policy factors. All specifications include individual, time, province and industry fixed effects as well as firm and city controls. The segmentation ratio remains set to K-fold=5 and the base learner is Random forest for all columns. All continuous variables are winsorized at the 1st and 99th percentiles to reduce the impact of extreme values. Standard errors are clustered at the firm level to account for heteroscedasticity and serial correlation. Robust standard errors are reported in parentheses. Significance levels are indicated by *** for 1%, ** for 5% and * for 10%.* | | | |

| *Table 6 Mechanism Test Result: land transfer and government investments* | | |
| --- | --- | --- |
|  | *(1)* | *(2)* |
| VARIABLES | *Land_transfer* | *Gov_Investment* |
| *LGA* | 5.979** | 0.596*** |
|  | (2.414) | (0.130) |
| *Constant* | -0.031 | -0.008 |
|  | (0.160) | (0.016) |
| *Observations* | 6,930 | 6,930 |
| *Individual fixed effect* | *YES* | *YES* |
| *Time fixed effect* | *YES* | *YES* |
| *Province fixed effect* | *YES* | *YES* |
| *Industry fixed effect* | *YES* | *YES* |
| *Firm Controls* | *YES* | *YES* |
| *City Controls* | *YES* | *YES* |
| *Segmentation ratio* | *K-fold=5* | *K-fold=5* |
| *Base learner* | *Random forest* | *Random forest* |
| *Notes: Table 6 employs the DML method to present mechanism test results focusing on land transfer and government investments. Land_transfer refers to the land transfer data of the cities where firms are located and Gov_investment denotes fixed asset investment. We construct a mediating effect model to analyze the mechanism through which local government attention (LGA) affects firms’ implied cost of capital. Column (1) uses Land_transfer as the mediating variable and Column (2) adopts Gov_investment as the mediating variable, both measuring the city-level mechanism of LGA’ s impact on the implied cost of capital of listed firms. All specifications include individual, time, province and industry fixed effects as well as firm and city controls. The segmentation ratio is set to K-fold=5 and the base learner is Random forest for both columns. All continuous variables are winsorized at the 1st and 99th percentiles to reduce the impact of extreme values. Standard errors are clustered at the firm level to account for heteroscedasticity and serial correlation. Robust standard errors are reported in parentheses. Significance levels are indicated by *** for 1%, ** for 5% and * for 10%.* | | |

| *Table 7 Mechanism Test Result: information disclosure channel* | | |
| --- | --- | --- |
|  | *(1)* | *(2)* |
| VARIABLES | *GMEA* | *CID_index* |
| *LGA* | 0.107*** | 3.116*** |
|  | (0.038) | (0.615) |
| *Constant* | 0.003 | 0.140 |
|  | (0.009) | (0.129) |
| *Observations* | 6,097 | 6,962 |
| *Individual fixed effect* | *YES* | *YES* |
| *Time fixed effect* | *YES* | *YES* |
| *Province fixed effect* | *YES* | *YES* |
| *Industry fixed effect* | *YES* | *YES* |
| *Firm Controls* | *YES* | *YES* |
| *City Controls* | *YES* | *YES* |
| *Segmentation ratio* | *K-fold=5* | *K-fold=5* |
| *Base learner* | *Random forest* | *Random forest* |
| *Notes: Table 7 employs the DML method to present mechanism test results focusing on the information disclosure channel. We construct a mediating effect model to analyze the mechanism through which LGA affects renewable energy firms’ implied cost of capital. Column (1) uses GMEA as the mediating variable where GMEA refers to executives’ environmental attention and Column (2) adopts CID_index as the mediating variable where CID_index denotes the CSMAR carbon information disclosure index, both measuring the information disclosure channel of LGA’ s impact on the implied cost of capital of listed firms. All specifications include individual, time, province and industry fixed effects as well as firm and city controls. The segmentation ratio is set to K-fold=5 and the base learner is Random forest for both columns. All continuous variables are winsorized at the 1st and 99th percentiles to reduce the impact of extreme values. Standard errors are clustered at the firm level to account for heteroscedasticity and serial correlation. Robust standard errors are reported in parentheses. Significance levels are indicated by *** for 1%, ** for 5% and * for 10%.* | | |
