# Supplementary material for: Towards Affordable Financing: The Role of Local Government Attention in Reducing Cost of Equity Capital for Renewable Energy Firms
Source: Research Square preprint supplement (doi:10.21203/rs.3.rs-8522490/v1), 2026-02-09
Supplement: Supplementary file 3 [file 57da75cf377613689e13b453.docx]

*Appendix*

*Appendix A. The measures of implied cost of capital*

| *Table A1: The measures of implied cost of capital* | | |
| --- | --- | --- |
| *Model* | *Measures of implied cost of capital* | *Source* |
| *PEG* | . represents the expected earings per share of a given firm. is the initial stock price of the certain firm in year t. | Easton (2004) |
| *MPEG* | . represents the expected earings per share of a given firm. is the initial stock price of the certain firm in year t. is the dividends per share. | Easton (2004) |
| *OJN* | , . represents the expected earings per share of a given firm. is the initial stock price of the certain firm in year t. is the dividends per share. r-1 is the long-term growth rate. | Ohlson and Juettner-Nauroth (2005) |
| *ICOC* | . | Hou et al.(2012), Huynh et al. (2020), Yan et al. (2025) |
| *Notes: To calculate the expected Earnings Per Share (EPS) in the above model, we estimate the following model based on Hou et al. (2012): . is the earnigns of firm in year , is the total asset, is the dividend payment, is a dummy variable that takes 1 if firm is a dividend payer or 0 otherwise. is a dummy variable that takes 1 if firm generates negative earnings in year t. means accruals, according to Hou et al. (2012), is the difference between earnings and cash flows from operations.* | | |

*Appendix B: The keyword list to measure the local government renewable energy industry attention*

| *Table B1: The keyword list to measure the local government renewable energy industry attention* | |
| --- | --- |
| *Category* | *Specific Content* |
| *Comprehensive Expressions* | renewable energy, clean energy, green energy, green power, green electricity, clean utilization of energy, multi-energy complementarity, integrated energy system |
| *Photovoltaic* | Photovoltaic, solar energy, solar-thermal, silicon material, silicon wafer, inverter, heterojunction battery, silicon crystal, monocrystalline silicon, polycrystalline silicon, silicon rod, silicon ingot, silicon raw material, PERC, TOPcon, HJT, silver paste, PET base film, fluorine film |
| *Wind Power* | Wind power, wind energy, onshore wind power, offshore wind power, wind turbine, wind power coating, wind power casting, tower cylinder |
| *Hydro-power* | Hydro-power, water energy, water turbine, excitation system, pumped storage |
| *Nuclear Energy* | Nuclear energy, nuclear power, nuclear reactor, nuclear fuel, nuclear waste treatment, nuclear safety, radiation protection, nuclear island, conventional island, nuclear cooling system, nuclear emergency, nuclear radiation monitoring, nuclear fuel assembly manufacturing, nuclear engineering, nuclear technology, nuclear physics |
| *Lithium Battery* | Lithium battery, lithium ion, lithium iron phosphate, ternary lithium, battery cell, battery pack, Battery Management System, solid-state battery, thermal management, cathode, anode, graphite, separator, high-nickel battery, thin-film battery, electrolyte, sodium battery, sodium-ion battery |
| *Energy Storage* | Energy storage, superconducting electromagnetic, superconducting capacitor, electrochemical, flywheel energy storage, compressed air energy storage, compressor, expander, heat exchanger, heat storage device, artificial cavern, redox flow, sodium-sulfur battery, molten salt energy storage, flow battery, hydrogen energy storage |
| *Hydrogen Energy* | liquid hydrogen, green hydrogen, grey hydrogen, blue hydrogen, hydrogen fuel, hydrogen refueling, hydrogen storage, electrolyzer, proton exchange membrane, hydrogen refueling, hydrogen storage tank, hydrogen liquefaction, hydrogen gas turbine, fuel cell, hydrogen gas turbine |
| *renewable energy Vehicle* | renewable energy vehicle, electric vehicle, EV, charging station, charging pile, battery swap station, electric bus. |
| *Digital Energy* | Smart energy, energy internet, energy digitization, digital energy, smart grid, virtual power plant, electrical equipment, grid equipment |
| *Other Energy Types* | Biomass, waste incineration, waste power generation, direct combustion power generation from agricultural and forestry waste, gasification power generation from agricultural and forestry waste, biogas, straw power generation, landfill gas power generation, geothermal energy, geothermal power generation, flash steam power generation, tidal energy, shale gas, CCUS , carbon capture |

*Appendix C: Representative Passages from Government Work Reports Concerning the Cultivation of the Renewable Energy Sector*

In this section, we have excerpted paragraphs from the coming year' s work plans in local government work reports of select representative cities, focusing on the development of renewable energy. We have chosen reports from different years for cities in the Northeast, Northwest, North China, and the Eastern coastal region, in order to analyze the specific characteristics of local governments' support for renewable energy as reflected in their reports. These key cities, which place strong emphasis on supporting the renewable energy sector, generally provide highly detailed support plans. For example, Baicheng explicitly calls for integrated "generation–grid–load–storage"development, while also setting clear targets for specific output values. Such texts inject very clear expectation signals into the market, as the public release of these reports means local governments are generally obliged to provide substantial actual financial or land support in order to achieve the objectives they have announced, which serve as important markers of government performance.

| *Table C1: Representative passages from local government work reports.* | | |
| --- | --- | --- |
| ***City*** | ***year*** | ***Representative Passages*** |
| Jilin Province, Songyuan City | 2022 | Vigorously develop new energy. The new energy industry is a pillar of Songyuan's economic growth. We will seize the strategic opportunity presented by the "dual carbon"goals, aiming to establish a national-level green energy demonstration zone. Efforts will focus on actively integrating into the "Onshore Wind and Solar Three Gorges"project, accelerating the creation of the "Western Hydrogen Valley"and "Western Ammonia Valley,"and jointly building the "Chang-Song-Bai Hydrogen Corridor."Leveraging green finance policies, we will pursue integrated "generation–grid–load–storage"development. A total of 102 projects have been planned and reserved, with combined investment reaching CNY 234.8 billion; among them, 39 key projects have commenced or resumed construction, involving CNY 20 billion in investment, adding 4 million kW of new installed capacity, delivering 3 billion kWh of electricity outward, and consuming 1 billion kWh locally. On the generation side, we will prioritize twelve projects, including wind and solar generation investments of CNY 42 billion by China National Petroleum Corporation and CNY 35 billion by CRRC Group. On the transmission side, we will advance seventeen projects, such as the Qian'an 500 kV transmission and transformation project (CNY 770 million) by State Grid Songyuan Power Supply Company, and the Changling Longfeng 500 kV expansion project (CNY 210 million). On the load side, we will bring the "Green Electricity"demonstration park into operation and accelerate three projects, including Shenyang Liming Gas's CNY 600 million investment in industrial gas and hydrogen production. On the storage side, we will launch two projects: the Qian'an 100 MW parity wind power project (CNY 150 million) by State Grid Wind Power, and the Qian'an 50 MW parity fishery–solar complementary photovoltaic project (CNY 80 million) by Sungrow Power Supply Co., Ltd. |
| Jilin Province, Baicheng City | 2023 | Emphasize the "green electricity" characteristic and promote high-quality development of the new energy industry by strictly implementing the Baicheng New Energy High-Quality Development Plan and focusing on building a new-type energy system. The city will adopt a "one chessboard" approach by strengthening municipal-level coordination, unifying external cooperation and project investment promotion, establishing a list of major new energy projects, ensuring the supply of land and other essential resources, and setting up municipal and county-level platform companies to jointly operate and maintain projects. It will adhere to an "all green electricity" strategy by ensuring the timely completion of demonstration projects such as lead-carbon batteries in the Green Electricity Park; promoting the start of projects including the Zhongfan energy storage power station, Yidao Photovoltaic, and Zhongshuitou anode materials; attracting projects such as Snow's 100,000-ton power battery anode materials and Envision's smart energy storage battery production base; and building an integrated "generation-grid-load-storage" industrial system, while improving "nine connections and one leveling" infrastructure to create a national-level green electricity industry demonstration zone. Efforts will also focus on building "large bases" by accelerating the "Onshore Wind and Solar Three Gorges" initiative, launching 2 million kilowatts of new wind and solar projects, striving for full-capacity completion and grid connection of the solar thermal demonstration project, securing clean and efficient peak-shaving coal-fired units, commissioning the Da'an Lesheng and Tongyu Fujia substations by year-end, attracting leading enterprises with core technologies, establishing a new energy industry alliance, and promoting supply-demand complementarity and market integration among local firms. Finally, the city will expand "new chains" by advancing the "green electricity + green hydrogen + green ammonia + green methanol" model, seeking awards and subsidies in the hydrogen sector, ensuring smooth operation of integrated hydrogen production and refueling projects, promoting Jidian's green hydrogen-ammonia integration demonstration project, starting construction on Envision's zero-carbon hydrogen-ammonia and biosynthesis project as well as Shanghai Electric's green electricity hydrogen-ammonia project, and implementing hydrogen blending in China Resources' natural gas system with the goal of becoming the nation's first pilot. |
| Jiangsu Province,  Changzhou City | 2023 | Focus on building a new energy capital to further highlight industrial advantages, steadfastly prioritizing the real economy and emphasizing intelligent manufacturing, promoting supply chain development through industries and strengthening industrial clusters through supply chains, so as to create a higher-level new energy capital that reaches new peaks atop the existing industrial plateau. Lead the race in the new energy sector with the ambition of attracting projects worth tens of billions of yuan, cultivating enterprises valued at hundreds of billions, and developing an industry worth trillions, by introducing and implementing major support policies, encouraging leading new energy companies to establish functional and regional headquarters, and facilitating the shift from simply locating in Changzhou to deeply cultivating in Changzhou. Efficiently promote the integrated development of all links in the new energy chain (generation, storage, transmission, and utilization), strive to establish a national-level strategic emerging industry cluster in new energy, achieve an annual output value in the sector exceeding CNY 600 billion, and raise the market capitalization of the new energy segment above CNY 500 billion. Advance the entire hydrogen energy chain from production and storage to transportation and application, support the construction of platforms such as the National Quality Supervision and Inspection Center for Hydrogen Energy Equipment Products and the Changzhou Institute of Hydrogen Science and Engineering, and accelerate development of “Changzhou Hydrogen Bay.” Expand the energy storage industry by implementing Phase Two of the Jintan salt-cavern compressed air energy storage project, focusing on large-capacity, high-density, long-life storage batteries, and accelerating the research, development, and industrialization of next-generation battery technologies. Build an application ecosystem for new energy by maintaining application-driven growth and continuously increasing penetration of new energy use across all sectors of society, accelerating national pilot projects for rooftop distributed photovoltaics across four counties (cities, districts), and in key areas such as the “Two Lakes” Innovation Zone, exploring the construction of photovoltaic-integrated buildings, PV-storage direct-current flexible buildings, and PV-storage-charging integrated charging stations as green energy demonstration projects. Support the first purchase, trial, and application of innovative new energy products, moderately advance the construction of charging piles, battery-swapping stations, and hydrogen stations, build 1,000 public electric-vehicle charging points in existing residential communities, and replace 200 buses with battery-electric models. |
| Hebei Province, Zhangjiakou city | 2016 | Conscientiously implement the Zhangjiakou Renewable Energy Demonstration Zone Development Plan of Hebei Province and fully launch a three-year action plan. On the basis of scientific, large-scale, standardized, and diversified development and construction of power stations, adhere to the combination of local consumption and rational external transmission, with a focus on achieving breakthroughs in renewable energy applications. Actively seek supportive national policies by strengthening coordination with state ministries and commissions and striving for special policies for Zhangjiakou in areas such as capacity quotas, electricity pricing, fiscal and tax measures, and power transmission. Implement a number of key projects as soon as possible, including starting preliminary work on the Zhangbei 1000 kV ultra-high-voltage transmission and transformation project, advancing the Zhangjiakou-to-Beijing flexible direct-current grid project to greatly enhance the city's capacity for renewable energy power transmission, and promoting projects such as Guyuan's wind-power-to-hydrogen initiative and the Zhangbei Big Data Center's renewable energy consumption program to form a comprehensive renewable energy utilization industrial chain. Accelerate the implementation of demonstration projects such as wind-power heating at the Construction Engineering College, aiming to reach 2 million square meters of new energy-based heating area across the city within the year. Vigorously promote integrated innovation in applications by continuing to strengthen cooperation with the Chinese Academy of Sciences, organizing a high-level expert advisory team, fully leveraging advanced application technologies, equipment, and innovative business models from State Grid Energy Conservation Company, and using energy internet platforms such as ENN Group to scientifically advance efficient and low-cost integrated applications of renewable energy. Gradually roll out initiatives to "replace coal with electricity"and "replace oil with electricity,"guiding and driving the strategic transition toward renewable energy replacing traditional fossil fuels as early as possible. Meanwhile, launch and implement integrated projects for distributed generation, transmission, and utilization, as well as plan agricultural renewable energy recycling projects including biogas, large-scale biogas production, and the use of biomass fuels as substitutes for coal. |
| Gansu Province, Jiuquan city | 2012 | Promote industrial transformation and upgrading to raise the level of industrial development. Implement the strategy of strengthening the city through industry by advancing, in parallel, the construction of peak-shaving power sources, export power grids, and comprehensive resource utilization, accelerating the establishment of a new industrial system in which clean energy and advantageous resources reinforce each other, and targeting industrial added value growth above 20%. Increase efforts in building new energy bases by completing the first batch of 3 million kW in Phase II wind power projects, achieving grid connection for a 650,000 kW large wind turbine demonstration project, and securing early approval for the subsequent 5 million kW in Phase II wind power projects, thereby aiming to complete the nation's first 10-million-kW-level wind power base. Actively obtain grid connection quotas for photovoltaic projects, promote the construction of photovoltaic, solar thermal, wind-solar complementary, and wind-solar-storage integrated projects, add 1,000 MW of new photovoltaic capacity, and strive to have Jiuquan included among China's 100 new energy demonstration cities and recognized as a national distributed photovoltaic power generation scale application demonstration zone.Seek approval and initiate construction of the Jiuquan–Zhuzhou ±800 kV DC transmission and transformation project to improve outbound energy delivery capacity. Concentrate development of the new energy equipment manufacturing industry by introducing projects in wind turbine supporting equipment, core component manufacturing, and photovoltaic material production; encourage new energy enterprises to prioritize locally manufactured wind and solar equipment; and work toward establishing in Jiuquan both the National Wind Power Research and Testing Center testing base and the National Solar Photovoltaic Power Generation System Quality Testing Center laboratory. Accelerate peak-shaving power source development by commencing construction of the Suzhou Power Plant and the Guazhou Changle Power Plant, adding 50,000 kW of new hydropower capacity, promoting multi-energy complementary development, and enhancing peak-shaving capabilities. |

*Appendix D: Construction Method of the Carbon Information Disclosure Index (CID Index)*

This section briefly summarizes the construction method of the CID index used in the main text. Following Lan et al.(2025), We obtained this index from the CSMAR database. The CID index is a composite measure that primarily reflects a company' s disclosure in the areas of Governance, Risk and Opportunities, Strategy, Targets and other index. In Table D1, we provide detailed identification methods for each sub-indicator of the CID index.

| *Table D1: the construction of CID index* | | |
| --- | --- | --- |
| **Category** | **Field Name** | **Field Description** |
| Governance | Board Supervision | If the company discloses information such as environmental protection philosophy, environmental policy, environmental management organizational structure, circular economy development model, and green development, assign 1; otherwise, assign 0. |
| Governance | Management Responsibility | Assign 0 if no information is disclosed about the management body (at the manager level) responsible for climate change; assign 1 if disclosed. |
| Governance | Employee Engagement | Assign 1 if the company discloses mechanisms to encourage employee participation in carbon reduction (including environmental protection-related education and training); otherwise, assign 0. Assign 1 if the company discloses participation in environmental protection-specific activities or environmental public welfare activities; otherwise, assign 0. Maximum score: 2. |
| Risk | Risk Management System | Assign 1 if the company discloses information about environmental management systems, frameworks, regulations, or responsibilities for identifying, assessing, and responding to climate-related risks and opportunities; otherwise, assign 0. |
| Risk | Risk Identification & Assessment | Assign 0 if climate-related risks affecting the company's financial or business development are not disclosed; assign 1 if disclosed. |
| Opportunity | Opportunity Identification & Management | Assign 0 if climate-related opportunities affecting the company's financial or business development are not disclosed; assign 1 if disclosed. |
| Strategy | Low-Carbon Transition Strategy | Assign 0 if no low-carbon transition strategy is disclosed; assign 1 if the low-carbon transition strategy is mentioned. |
| Targets | Carbon Reduction Targets | Assign 0 if no carbon reduction targets are disclosed; assign 2 for qualitative disclosure of carbon reduction targets; assign 4 for quantitative disclosure. |
| Targets | Other Climate Management Targets | Assign 0 if no other climate-related targets are disclosed; assign 2 if disclosed. |
| Targets | Emission Reduction Measures | Assign 0 if no emission reduction actions are disclosed; assign 2 for qualitative disclosure of emission reduction actions; assign 4 for quantitative disclosure. |
| Targets | Business Transformation Progress | Assign 0 if existing goods and/or services are not classified as low-carbon products/services; assign 2 for qualitative disclosure of low-carbon products/services; assign 4 for quantitative disclosure. |
| Other_Index | Scope 1 GHG Emissions | Assign 0 if Scope 1 emissions are not reported; assign 2 for qualitative disclosure; assign 4 for quantitative disclosure. |
| Other_Index | Scope 2 GHG Emissions | Assign 0 if Scope 2 emissions are not reported; assign 2 for qualitative disclosure; assign 4 for quantitative disclosure. |
| Other_Index | Scope 3 GHG Emissions | Assign 0 if Scope 3 emissions are not reported; assign 2 for qualitative disclosure; assign 4 for quantitative disclosure. |
| Other_Index | Carbon Emission Intensity | Assign 0 if no carbon emission intensity indicators are disclosed; assign 2 for qualitative disclosure; assign 4 for quantitative disclosure. |
| Other_Index | Emission Changes | Assign 0 if changes in total emissions (Scope 1 and Scope 2) are not disclosed; assign 2 for qualitative disclosure of changes; assign 4 for quantitative disclosure. |
| Other_Index | Scope 1 Emission Decomposition | Assign 2 if Scope 1 emissions are disaggregated by GHG type, country/region, or subsidiary/business unit; assign 0 if not disclosed. |
| Other_Index | Scope 2 Emission Decomposition | Assign 2 if Scope 2 emissions are disaggregated by GHG type, country/region, or subsidiary/business unit; assign 0 if not disclosed. |
| Other_Index | Value Chain Interaction | Assign 1 if the company discloses engagement with value chain partners on climate-related matters (including collecting climate information from customers/suppliers, or engaging/incentivizing climate activities of customers/suppliers); assign 0 if not disclosed. |
| Other_Index | Upstream & Downstream Client Management | Assign 1 if the company discloses management of climate risk behaviors of supply chain partners (e.g., whether suppliers meeting climate-related requirements is part of the procurement process); assign 0 if not disclosed. |
| Other_Index | Other Climate Information | Assign 1 if any other business-related climate indicators are disclosed; assign 0 if not disclosed. |
| Other_Index | Verifiability | Assign 1 if carbon disclosures are third-party assured; otherwise, assign 0. |

*Appendix E: Details of UHV Transmission Line Construction*

This section primarily provides the basis for classifying the heterogeneity of UHV transmission lines within regional heterogeneity analysis. The construction of China’ UHV transmission line is widely used to capture the degree of transregional energy integration (Ren et al., 2025). Table E1 presents the project names, starting provinces, and destination provinces of all completed UHV transmission lines in China, along with key information such as project approval dates, commissioning dates, line lengths, and investment amounts.

| **Table E1: Details of UHV Transmission Line Construction** | | | | | | | |
| --- | --- | --- | --- | --- | --- | --- | --- |
| **Project Name** | **Starting Province** | **Destination Province** | **Voltage Level**  **(kV)** | **Approval Date** | **Commissioning Date** | **Line Length**  **(km)** | **Investment**  **(100 million RMB)** |
| Yunnan-Guangdong | Yunnan Province | Guangdong Province | ±800 | 2006 | Jun-10 | 1438 | 137 |
| Xiangjiaba-Shanghai | Sichuan Province | Shanghai Municipality | ±800 | Apr-07 | Dec-10 | 1907 | 233 |
| Jinping-Southern Jiangsu | Sichuan Province | Jiangsu Province | ±800 | Nov-08 | Jul-12 | 2100 | 220 |
| Hami South-Zhengzhou | Xinjiang Uygur Autonomous Region | Henan Province | ±800 | May-12 | Jan-14 | 2210 | 234 |
| Xiluodu Left Bank-Jinhua (Zhejiang) | Sichuan Province | Zhejiang Province | ±800 | Jul-12 | May-14 | 1600 | 239 |
| Jinping North-Taizhou (Jiangsu) | Sichuan Province | Jiangsu Province | ±800 | Dec-10 | Apr-15 | 1483 | 243 |
| Ningdong-Zhejiang | Ningxia Hui Autonomous Region | Zhejiang Province | ±800 | Aug-14 | Sep-16 | 1720 | 237 |
| Jiuquan-Hunan | Gansu Province | Hunan Province | ±800 | May-15 | Jun-17 | 2383 | 262 |
| Northern Shanxi-Nanjing | Shanxi Province | Jiangsu Province | ±800 | Jun-15 | Jun-17 | 1119 | 162 |
| Xilingol League-Taizhou (Jiangsu) | Inner Mongolia Autonomous Region | Jiangsu Province | ±800 | Oct-15 | Oct-17 | 1620 | 254 |
| Zhalute-Qingzhou | Inner Mongolia Autonomous Region | Shandong Province | ±800 | Aug-15 | Dec-18 | 1298 | 208 |
| Shanghai Temple-Guangzhou | Inner Mongolia Autonomous Region | Guangdong Province | ±800 | Dec-16 | Dec-17 | 1229 | 222 |
| Shanghai Temple-Linyi | Inner Mongolia Autonomous Region | Shandong Province | ±800 | Dec-15 | Jan-19 | 1238 | 221 |
| Eastern Yunnan-Southern Anhui | Yunnan Province | Anhui Province | ±1100 | Dec-15 | Sep-19 | 3324 | 407 |
| Qinghai-Henan | Qinghai Province | Henan Province | ±800 | Oct-18 | Jun-21 | 1563 | 226 |
| Yazhong-Jiangxi | Sichuan Province | Jiangxi Province | ±800 | Aug-19 | Dec-20 | 1966 | 244 |
| Northern Shaanxi-Hubei | Shaanxi Province | Hubei Province | ±800 | Jan-19 | Apr-22 | 1127 | 185 |
| Baihetan-Zhejiang | Sichuan Province | Zhejiang Province | ±800 | Jul-21 | Dec-22 | 2140 | 242.49 |
| Baihetan-Guangdong & Guangxi | Sichuan Province | Guangdong Province, Guangxi Zhuang Autonomous Region | ±800 | Mar-18 | Dec-20 | 1652 | 249 |
| Baihetan-Jiangsu | Sichuan Province | Jiangsu Province | ±800 | Nov-20 | Jul-22 | 2087 | 307 |
| Southeast Shanxi-Nanyang-Jingmen | Shanxi Province | Henan Province, Hubei Province | 1000 | Aug-06 | Dec-08 | 654 | 56.86 |
| Huainan-Northern Zhejiang-Shanghai | Anhui Province | Zhejiang Province, Shanghai Municipality | 1000 | Sep-11 | Sep-13 | 2×665 | 185.38 |
| Northern Zhejiang-Fuzhou | Zhejiang Province | Fujian Province | 1000 | Mar-13 | Dec-14 | 2×603 | 200 |
| Xilingol League-Shandong | Inner Mongolia Autonomous Region | Shandong Province | 1000 | Jul-14 | Nov-16 | 2×770 | 173.6 |
| Huainan-Nanjing-Shanghai | Anhui Province | Jiangsu Province, Shanghai Municipality | 1000 | Apr-14 | Jul-16 | 2×779.5 | 261.1 |
| Sutong GIL Integrated Corridor | Jiangsu Province | Jiangsu Province | 1000 | Apr-14 | Sep-19 | 34.2 | 41.33 |
| Western Inner Mongolia-Tianjin South | Inner Mongolia Autonomous Region | Tianjin Municipality | 1000 | Jan-15 | Nov-17 | 2×608 | 241.5 |
| Yuheng-Weifang | Shanxi Province | Shandong Province | 1000 | May-15 | Aug-16 | 2×1048.5 | 178 |
| Xilingol League-Shengli | Inner Mongolia Autonomous Region | Shandong Province | 1000 | Jan-16 | Aug-17 | 2×236.8 | 49.56 |
| Northern Shaanxi-Shijiazhuang | Shaanxi Province | Hebei Province | 1000 | Jul-17 | Jun-19 | 2×222.6 | 34.4 |
| Shandong-Hebei Loop Network | Shandong Province | Hebei Province | 1000 | Oct-17 | Jan-20 | 2×819.5 | 140.4 |
| Zhangbei-Xiong'an | Hebei Province | Hebei Province | 1000 | Nov-18 | Aug-20 | 2×191.9 | 59.8 |
| Western Inner Mongolia-Jinzhong | Inner Mongolia Autonomous Region | Shanxi Province | 1000 | Nov-18 | Dec-20 | 2×100.4 | 54 |
| Zhumadian-Nanyang (Supporting) | Henan Province | Henan Province | 1000 | Mar-19 | Sep-20 | 2×388 | 50.8 |
| Nanchang-Changsha | Jiangxi Province | Hunan Province | 1000 | Dec-20 | Dec-21 | 2×341 | 102 |
| Nanyang-Jingmen-Changsha | Henan Province | Hubei Province, Hunan Province | 1000 | Apr-21 | Oct-22 | 286.164+2×339.682 | 81.65 |
| Jingmen-Wuhan | Hubei Province | Hubei Province | 1000 | Nov-21 | Dec-23 | 2×233 | 65 |
| Zhumadian-Wuhan | Henan Province | Hubei Province | 1000 | Dec-20 | Nov-24 | 2×226.5 | 38 |
| Fuzhou-Xiamen | Fujian Province | Fujian Province | 1000 | Jan-22 | Dec-23 | 2×234 | 71 |
| Wuhan-Nanchang | Hubei Province | Jiangxi Province | 1000 | Jun-22 | Nov-24 | 2×452 | 90.82 |
| Zhangbei-Shengli | Hebei Province | Shandong Province | 1000 | Sep-22 | Oct-24 | 2×365.9 | 67.86 |
